# Supplementary material for: A Juvenile Specimen of Archaeorhynchus Sheds New Light on the Ontogeny of Basal Euornithines
Source: Frontiers journal article supplement (doi:10.3389/feart.2021.604520), 2021-04-16
Supplement: Table_2.DOCX [file Table_2.DOCX]

xread

246 62

Dromaeosauridae ?0000000000000000000000000000000000000??00000000000000000000000000000000001????1?0000000000000?000000000000020?[0 1]??00000000000000100000000000000100000000??000?000000000000000[0 1]0000000[0 1]00000000000010000[0 1]00?000000000100000000000000000000[0 1]000000000000

Archaeopteryx ?00000000000000?0010010?00?000??0?000???0000000?1000?100000??00000?00020001????0?0000000000000?0000?0?0000000????????????000?0001100000000000???00000000??001000001000000000000002000000001?0001?010000??0?00000?0001?0??0??00000000000000?0?00?000100

Jeholornis ?[0 1]?23111????????????0?????????????00?????000?00?1??0????00??10000????010000??????01101?000001??110?????1??00[1 2]?????????????0000000000?0[0 1]00??01011110?0000012110010000100000000100130000000011?101?010010????0???0?0??0[0 1]0?10??1100000000??00?0200?0010?0

Sapeornis ?1010010[0 1]?0??????0010?1?0?????????1?0????00??0??1????100[0 1]01??10010?0024000000?00?000011000000??000000??10002??????????????00?00001100000???0100111????00??21100001000?0000010101030000??0?110101111?010010??0100?1000?0?111?11000000000000?0000?0011??

Confuciusornis_sanctus ?10231111?0?????00010110000120???11?1121010?1100?101?101[0 1]01112001000024000[1 2]00001?0100?0?0000???00000000000002[1 2]111?0112100000010002102000001010000100210001210?0001100?00000002100200000000?101011110010101120101?1?0010000?111000010001021002000001100

Confuciusornis_dui ???23111????????????????0?????????1???????0??1??????????????????[0 1 2]????14?10?0??0??0??????????????????????????2[1 2]?0??0???10?0?0??00021?????????????01?????0???1??0[0 1]00?00?00[0 1]??0021002?????????????????????????[0 2]?????????1???????10????0?00????0[1 2]00?0010?0

Changchengornis ?1?231111?0????????1??????0???????1?11??0?0??100???[1 2]?????????2??1???024??0?0000??0100?0?000????000000?0?000021?1??01??10?0?0????02??????????????01?????0????0?0000?0??000000021002???0???????????[1 2]???1????????????0?????????110000?0?0??2??0100?0011?0

Eoconfuciusornis ?[1 2]?231?1[0 1]?0??????0????????????????1?01??000??100????0?0?00???0??1???0241???0??0??0000???000000?0000?0?0000?02[1 2]???????????0?00000?100?0???000????01?????0??01??00001?0?0000000210020??0??0?????????10010??????????0??????10????0?000000002?00200?001000

Chaoyangia ?????????????????????????????????????????????????????????0???[1 2]??[2 3 4]??????????????[1 2]1??????????????????????????????????????????????????????????????????????????????????????????????????0?0??0???01010[1 2]1?001?0?0???0?????[1 2]???????1?????????????????????????

Xinghaiornis ?[0 1]123011[0 1]?1????????1??????????????1??????10??0??????????????????[2 3 4]????[1 2]4??0?1000???1111100100???2100????111?[2 3]2[2 3]?[1 2]21111????010??00020?3?[0 1]?????????11??2?10?????????1?[0 1]0??0?1010?01131000??0??1?101?21????????2??0??1?1?1????0?11[1 2]01???001?0??01?0??010??

Eogranivora ??023??1??????????????????????????1?10???????????????????????????????24?[1 2]1110?0???1111?0?10????[0 1]1??????121??23022111???0???0????010????????01???1??????01??1??01?00000?02101010113?000????11??????1??11??????????1?0???????211[0 1]010?0???????0000?00???1

Parahongshan ??????????????????????????????????????????????????????????????????????????????????1111?0?10????010?00?0?21?123?220?????0???0????0100?0?????01???10????1????1??0???1?00?01100010101??????????0100?1???10????????????0[1 2]?[0 1]?[1 2]???1??????0????0??0000?0011??

Zhongjianornis ?01?3??1??????????????????????0?0?1?10??0????????????????011?1????????[3 4]??01????11?????1?????????10?0??01110??????????????0?0??00020?????0000????11?????0??2???001100010?1000000113?0101?0?01?101?[1 2]??0???0?[1 2]2??0????0?[0 1]????????[1 2]?1??0[0 1]00??????0??0?11??

Boluochia ??1[1 2][0 2]????????????????????????????????????????????????????????????????2????????1?????????????????????????????[1 2][1 2]?[1 2]??????20????????????????????????????????????????????????????????????????????110101???10??????????0???????????0[0 1]?100100002??3200?0011??

Shenqiornis ?[0 1]0101102????????0??????0?1???????000???000???1?1???11?0?01??11??????????0???????01111?0?01?[1 2]??000?0???011?[2 3]2[1 2 3]?[1 2][1 2]1?1??20??01101?000?????????1???11????????01??001010010110010101130000??????01?111???10??????????0???????????00??0010???2???[0 1]?0?0?1???

Cathyaornis ?[1 2]0[1 2]0??0[0 1 2]?????????????????????????000????00?????1??1??1??0???11?2????240?0?0111???1111?0???0???000100?0111?322122111??20?0011?11010211[0 1]01011111011????110?31100010?[0 1]00012001010122000000??11??????100????12????1????[0 1]?????1?1?????????????????????????

Concornis ?????????????????????????????????????????????????????????01??11????????0?01???????111110?01?11?00?1?????1112221221110?20?00111??0[0 1]0211??????1????1112????????????0??0???20010[0 1]0122??????????11?1?[1 2]??01?0?????????1111???????1110?0010??0[0 1]??0000?001???

Elsornis ???????????????????????????????????????????????????[0 1]??10?0?1?10???????????????????111110001121?000100010111[2 3]22010?11??[1 2]0?00110000000[1 2]010000111??0100[1 2]1?1??31?????0?[0 1]?01???????????????????????????????????????????????????????????????????????????????

Eoalulavis ???????????????????????????????????????????????????00111200??2?0???????????????0??11111010111100000000?111?312?0??010?30?00111100102110010011111111?21?1?????????0??1?011001????2???0?????1??????????????1?1????????????????????????????????????????1?

Eocathayornis ????0???????????????????0???0?????000????00?????1????????00???????????????????????11?????01????000000??0????2212[1 2]111??20??01??1?000???[0 1]????11???10??????0?31??0010??0001200100011?????????????????????????????????????????????????????????????????????

Eoenantiornis ?[0 1]010??0????????????????0?????????00????????????1???????????????[0 1 2]????24020?????1?0111110101?11000??00???11122[1 2 3]?1??110?2000?1??1?000?????????????11?????10?31??0000?000011001010122???0???????????[1 2]??0[1 2]0????1?????????????????11??0?10??????0??1?0?1110

Gobipteryx ?10[1 2]3101300021?10????????0???0?1??1?[0 1]0???10???10??????1?????????[0 1 2]10??[1 2]401?????????1111?010?1???0??0000??111[2 3]?????????????0??????0??????0????????11???111?????????0??0?01?00??????20???????????????10?11???????????10[0 1]10?011?110010?100??11?0??1?1?????

Iberomesornis ???????????????????????????????????????????????????0??1110??1000001?0[1 2]401010???0??11???0?00?2??0????????11?[2 3][1 2][1 2 3]???????????????0???????1?0???111??11???????????????????????????????????????????????1??0???????0????01?0????????00?100000001??000??0011??

Longipteryx ??122111??????????????????????????000????00??01?1??1011?????????2????24??0?01?11?0111110100????000?000?111132[2 3]?21101??20??0110??0002??[0 1]?0?011?1?11?????00?01100000100?0110010001130000????1111011[1 2]11010?0?[1 2]1?10????0????0?1?1?0?1000000001?[1 3]2000001[0 1]??

Longirostravis ?[0 1]022??1??????????????????????????00?????00??01?1??1?????0?????01????24??0?01?10?0111????00?2??000?00??0111[1 2 3]2[1 2 3]?221110?20??01??1??00???[0 1]?????????10??????0?31??10?0?[0 1]0101?0011?0122??0?????1??10?1?11????0?1??????1?00?????1?11[0 1]?10000??0???0100?00????

Neuquenornis ?????????????????????????????????????????????????????????0???11???????????????????111????011111000????1?1111230[1 2]?1?1?????0????11?????1?01?01????11?1??11??31??10?0?[0 1]0001?????????????????????????????????1110???????1????????10??0?1??1?2?00?011001[1 2]??

Otogornis ??????????????????????????????????????????????????????????????????????????????????11111?????????0??00????????????????????0?1??10010???[0 1]?0001111?11????????????????????????????????????????????????????????????????????????????????????????????????????

Eopengornis ?0000110[0 1 2]?0?????????????0?????????00000?000?????1??10?0??00??????????24??0?1?????01111101010???000?01?00111321?110?1??10?0?10010000??10?0001????10??????0??1[0 1]?00?0?001011001010103??????????????????010???????0????100??????0???0001????1??0101?0012?0

Pengornis ?00[0 1]01101?0??????0??????0?1???????000???0?0?????1102??1??0?1?10?1????240?0[1 2]??00??01111???01?????0?001???11?2?????????????0?0?0100101??[0 1]?100?1???11??????1[0 2][2 3]111???0?01001?0010?0??3???????????????????[0 1]0?01???????1??[0 1]?01[1 2]11?0100?00100101200101?00????

Protopteryx ?[0 1]?[1 2][0 2]1????????????????????????????00??????00????1???????10?????01????14????0??1???1111?0?11?[1 2]??200?00??01113221110?1??10???1????010?????????????11?????????1??000??[0 1]0001000000010???00????11?????????10????1?????0???????????00??0000??00??0[0 1]01?001110

Rapaxavis ?[0 1]022??1[0 1 2]?????????????????????????000???0?0???1?1?????1??01??11?1???024??0?0??10?011???0?00?[1 2]??0???0????11?322122111??20??0100??0000??[0 1]0???1111?10???1??0??11?00?010000120011?01230000?0??111101?111?1000????????0?0[0 1]?0?11??100?10000??002?0100?0011??

Shanweiniao ?[0 1]?[1 2][2 3]??1????????????????????????????0????00??01??????1???????????????24???????1??01111???000[1 2]??000?00??011?22[1 2 3]?211?[0 1]??20???1?????00????????11???11????1?????????????????[0 1]0?11???22?????????1??????1??[1 2]?0?????[0 1]0??1??????????110??0000????1?[0 1][0 1]?0?0?1[0 1]?1

Vescornis ??0?????[1 2]?????????????????????????0000???00[1 2]001?1??21?1??0???1??2????2???????00??0111??0?01?[1 2]??000?00??011?3221[1 2]??11??20?00110??0101?1[0 1]0???1111111??????1[0 2]011010?00[0 1]0?0120010[0 1]01220??0???????????????????????????0??[0 1]????????00??0010??011?[0 1]201?1011??

Vorona ???????????????????????????????????????????????????????????????????????????????????????????????????????????????????????????????????????????????????????????????????????????????????????????????????????101?11[0 1]?110101[1 2]100111111100100011?220100000????

Schizooura ?0123111[1 2]????????????????????????11?0????10??01??0?[1 2]1?00?00?1??0[3 4 5]?1??[1 2][3 4]?[1 2]0[1 2]?000??01111?0?1001??????0????11012[2 3]0[1 2]1011??1??1?000??0[1 2]0010[0 1]0???01?0?10?????00?31??0020?001?02001010103?0??1[0 1]1???0101?1?0111?????[1 2]?0?????[1 2]???????11?010?00001[0 1]2?011000010?1

Archaeornithura ????????????????????????????????????????????????????????????????[2 3]???0[1 2]4??1110001?011111?010110?211000?0?2101230[1 2]?111???????0??100100?0[0 1]????0110?11?????0??31??0[1 2]?1?[0 1]01?00100010101?0????????01001[1 2]??011????2??0??1?0????10021110?1?01???[0 1]??0120?001111

Jianchangornis ??????????????????????????????????1????????????????1?????010?200[2 3 4]0???????????????0111110010020?010????0121?02[2 3]0[2 3]1011??[0 1]??0?000000100100000001?0111?????0???1??01?00000000101010103??01?[0 1]?????????[1 2]?001????????00???0??0?10??11[1 2]0?0000??????0100?00???0

Dingavis ?[0 1]023??1??????????????????????????1?10???000???????2?????????????????24?????000??0?1????????????10000??1????2[2 3]?[1 2]???????0?010??00000?????1???????1?????????21??02?1?000002101010102?0??????11???11[1 2]??011?02[0 1]2?[1 2]0??1??[1 2][1 2]??????112011???00102?02[1 2]0?0011??

Liaoningornis ????????????????????????????????????????????????????????????????????????????????????????????????????????????[1 2]2?0??1[1 2]??30???????????????????0?????1???????????????????????????????????????????????????????????????????????????110?001????1[1 2]?0100?001[1 2]??

Songlingornis ????[0 1]?????????????????????????????000?????0?????1????????????2????????????????????11?????101???2????????21?023012111??41??????????????????????????????????????????????????????????????????????????????????????????????????????????????????????????????

Ambiortus ???????????????????????????????????????????????????01?0??????20???????????????????1?111001???1?[1 2]1??01???210??????????????1000100?10?????????????????????0?3????[1 2]?????????1010?????????????????????????????????????????????????????????????????????????

Longicrusavis ?10[1 2]01?0???????????????????????????00???101??01????11?11?0???20???????????????????1111100?0????[1 2]1100??01210?23?120110?10?110?01?11012011100010001100???0??31110??00010100100010101???????11??1???[1 2]??0?????????01?10022[0 1]121?1112011100??10100100?0011??

Apsaravis ???????????????????????????1[0 1]?????1?1????1????????021?1?201??00?4??0?24?10????????1111100001111111001001????[1 2]30???11?????11001000101110000111111110121101?311001110110???1????????100011111?111012??121101[1 2]?110??1???20121??11[1 2]?111001?1?200100?00????

Hongshanornis ??020?11??????????1???????????????100???101??0???????????????1???????24???????01?0111110010????211??0?0121?12??2201???10?110?????10???1????0????11????????31??00?0??00?01101010101??????????0??01[1 2]???[1 2]1???????????0?[1 2]???????1120?0?00?0?0??0200?001111

Yanornis ?10[1 2]1110??1????????1?????????????1000???1?00?01?1??0?????01??2003??0?????????????01111110100?0?210000??121?02301211[1 2]??41?11001??010110[0 1]????0100011?0?11?0?31110000000010110101012310100?11?10100?11?010??1???????1?0??0??0??111011?00[0 1]??12?0100?0011??

Iteravis ??023110??????????????????????????00?0??1?0??00?1???1?01?01?02?0????024?1???000??0111110?10?10?210????0121002301201[1 2]??[0 1]1???000??0[0 1]0??0?0????1?0?11?1???01??1?001[0 2]11010?0210100?122100?1?0?1?0101?110010?111???0?????[1 2]??111??11211110?[0 1]?102?1210?0011??

Patagopteryx ?????????????????1?11110001111????????????0??000?11211011001100031101??120????????1111100000?0?11100?0??????2[1 2]????10?????1001???1000?0?00000100?0000?0?0?????????0??1?1??0?00???20?0001000001110121?021?0??20????1001?0?01111120101001110000?00?0001??

Hollanda ????????????????????????????????????????????????????????????????????????????????????????????????????????????????????????????????????????????????????????????????????????????????????????????????????????????1101100022002012111000212[1 2 3]1112[1 2]0?0001?????

Yixianornis ?1121???????????????????0???1?1???0?0???110?????1??1?1??2011?1003??0?24????1000[1 2]00111110010010?210000001210?2301111?0?41??10??11??0?0?0?11001?0?100021?0??3111012100001?1101010102100?1??00?01??11??01???1?2?101?100????????11[1 2]01?0001110?0010??0011?1

Gansus ??????????????????????????????????????????????????121?1?201111004001024?20210000?1111110010020?3100??0012100230210100?10?11001??010130?1???010011100111?0?312?01110001?121010001321?0011110101011210011001[1 2]?1101?100[1 2]2?0?0?211201110010102?020000011??

Ichthyornis ?21[1 2]???0?????????111111??1111???01001????0021011111[0 1]11012011120?[3 4]?0102401021000???111111010010?2110100012?002300??1?12?011100110010120110?101000110021101?31210121010010?1111????310?01011??1101121?12?101221101?100221110?2112011202?01?210200000????

Hesperornis ?11231103?1021011?111111000111?1?10100??100010101?021001211112004010?130202100010?0101?00?0010?010???000200?21?0??0111?00??????0?????1000000??????????????????????????????????????1000121101110012101211021222011101221111121120112?21013223220102????

Parahesperornis ?1123??0???0?10??1?111???00111????01????????????1?02100121111200?????1?????10001??0101?0??0010?0????????????2???????1??????????????????????????????????????????????????????????????????????????????????1021222011101221111???1201?2?2101?223220002????

Enaliornis ???????????????????????????11??????????????????????21?0??1???2????????????????????????????????????????????????????????????????????????????????????????????????????????????????????1??????1???????2?????1012212011101221111???1201???1101???0120000????

Baptornis_advenus ?1??3??????????????11???00?111???????0??1?0?10101?021001?11112004010?13020?100011?0101?0010010?0?????0??????2[1 2]????0111??0????????????1000000????00000100?????????????????????????010001211011100121012110112120111012211111211201?2?11013221120001????

Baptornis_varneri ??????????????????????????????????????????????????021?01?1??1?????????????????????????????????????????????????????????????????????????????????????????????????????????????????????10????1???1100?210121?????2201?1012211111211201?2?1101?221220001????

Limenavis ?????????????????????????????????????????????????????????????????????????????????????????????????????????????????????????????????????111?0001000??00111???3121031?????10?10???????????????????????????????????????????????????????????????????????????

Vegavis ???????????????????????????????????????????????????2????????????[5 6]?????????????????1111?00?001??110?00????????????????????1?0???????????????????????????1??????????????????????????01???1?????01??2??????0112110??1?02?2?1????12011???3?1????1???0?????

Anas ?2123011310111111111111111112112111?102100001011?102110121111000601202402021000201111111010020?210000001210023111001133011100111100030111110100001001110123120132111111021011??12311011111010111121012110112110111002220111211201120130132102200001011

Gallus ?1123111311121111111111111112112111?102000001011?102110121111001601202402021000201111111010020?211000001210123110101122011100111100030111111100011001110113120132102101121011??12111011211011011121012110112110111002220111211201120130132201201001011

Archaeorhynchus ?1013111[1 2]?????????????????????????1?00??00000??1???01?0??0??1???2000?2401111???[1 2]001111?0010?20?110000?0121002[2 3]1[1 2]2111??20?11000??010???00???0110?10????101?31??002010000021010101030000????1?01001[1 2]10010??????????0?0[1 2]00????2111010100??0?0?0100?00?0??

LNTU_WLMP_18 ???23?11??????????????????????????1?????0?????????????????????????????????????????111????10????10????????????????????????11?????000???0????0????10?????????1??00?0????0?2????????2?00???0?1?01001[1 2]1?01??0????????0????????????0?10?0????????0?0?0??0??

;

Ccode

-[/1 0 +[/1 1 -[/1 2 +[/1 3 -[/1 4

-[/1 5 -[/1 6 -[/1 7 +[/1 8 -[/1 9

-[/1 10 -[/1 11 -[/1 12 -[/1 13 -[/1 14

-[/1 15 -[/1 16 -[/1 17 -[/1 18 -[/1 19

-[/1 20 -[/1 21 -[/1 22 -[/1 23 -[/1 24

-[/1 25 -[/1 26 -[/1 27 +[/1 28 -[/1 29

-[/1 30 +[/1 31 -[/1 32 -[/1 33 -[/1 34

-[/1 35 -[/1 36 -[/1 37 -[/1 38 -[/1 39

-[/1 40 -[/1 41 -[/1 42 +[/1 43 -[/1 44

-[/1 45 -[/1 46 -[/1 47 -[/1 48 -[/1 49

-[/1 50 +[/1 51 -[/1 52 -[/1 53 -[/1 54

-[/1 55 +[/1 56 -[/1 57 -[/1 58 -[/1 59

-[/1 60 -[/1 61 -[/1 62 -[/1 63 +[/1 64

-[/1 65 -[/1 66 +[/1 67 -[/1 68 +[/1 69

+[/1 70 -[/1 71 +[/1 72 -[/1 73 +[/1 74

-[/1 75 -[/1 76 -[/1 77 -[/1 78 -[/1 79

-[/1 80 -[/1 81 -[/1 82 -[/1 83 -[/1 84

-[/1 85 -[/1 86 -[/1 87 -[/1 88 -[/1 89

-[/1 90 -[/1 91 +[/1 92 -[/1 93 -[/1 94

-[/1 95 -[/1 96 -[/1 97 -[/1 98 -[/1 99

-[/1 100 -[/1 101 -[/1 102 -[/1 103 -[/1 104

-[/1 105 -[/1 106 +[/1 107 -[/1 108 -[/1 109

-[/1 110 -[/1 111 -[/1 112 -[/1 113 -[/1 114

-[/1 115 -[/1 116 +[/1 117 -[/1 118 -[/1 119

-[/1 120 -[/1 121 -[/1 122 -[/1 123 -[/1 124

-[/1 125 -[/1 126 -[/1 127 -[/1 128 -[/1 129

-[/1 130 -[/1 131 -[/1 132 -[/1 133 -[/1 134

-[/1 135 -[/1 136 -[/1 137 -[/1 138 -[/1 139

-[/1 140 -[/1 141 -[/1 142 -[/1 143 -[/1 144

-[/1 145 -[/1 146 -[/1 147 -[/1 148 -[/1 149

-[/1 150 -[/1 151 -[/1 152 -[/1 153 -[/1 154

-[/1 155 -[/1 156 -[/1 157 -[/1 158 +[/1 159

-[/1 160 -[/1 161 -[/1 162 -[/1 163 -[/1 164

-[/1 165 -[/1 166 -[/1 167 +[/1 168 -[/1 169

-[/1 170 -[/1 171 -[/1 172 -[/1 173 -[/1 174

-[/1 175 +[/1 176 -[/1 177 -[/1 178 -[/1 179

-[/1 180 -[/1 181 -[/1 182 +[/1 183 -[/1 184

-[/1 185 -[/1 186 -[/1 187 -[/1 188 -[/1 189

-[/1 190 -[/1 191 -[/1 192 +[/1 193 -[/1 194

-[/1 195 -[/1 196 +[/1 197 -[/1 198 -[/1 199

-[/1 200 -[/1 201 -[/1 202 -[/1 203 -[/1 204

+[/1 205 -[/1 206 -[/1 207 -[/1 208 -[/1 209

-[/1 210 -[/1 211 -[/1 212 +[/1 213 +[/1 214

-[/1 215 +[/1 216 -[/1 217 -[/1 218 +[/1 219

-[/1 220 -[/1 221 +[/1 222 -[/1 223 -[/1 224

-[/1 225 -[/1 226 -[/1 227 -[/1 228 +[/1 229

-[/1 230 -[/1 231 -[/1 232 +[/1 233 +[/1 234

-[/1 235 -[/1 236 -[/1 237 -[/1 238 -[/1 239

-[/1 240 -[/1 241 -[/1 242 -[/1 243 -[/1 244

-[/1 245;

proc /;

comments 0

;
